# Supplementary material
Source: MDPI journal article supplement (https://www.mdpi.com/2227-9717/7/10/642)
Supplement: s1 [file s1]

Supplementary Materials:

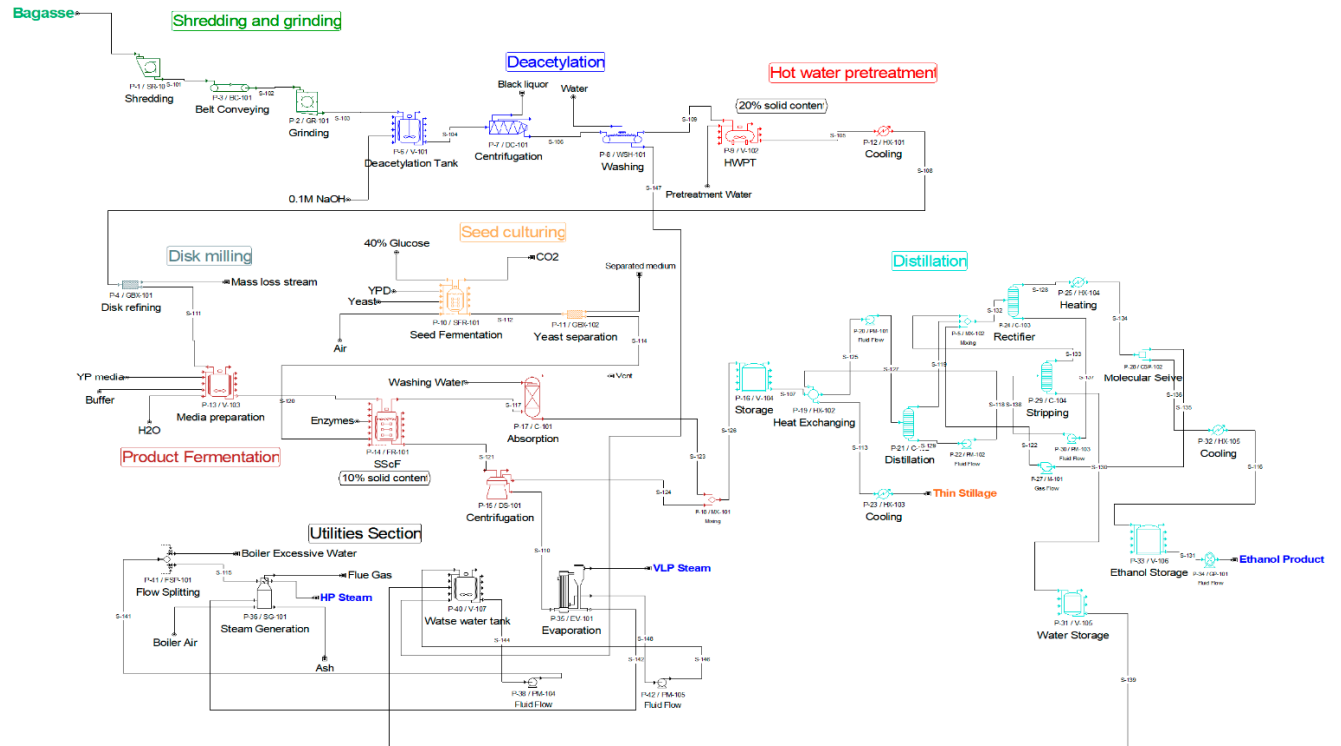

Figure 1. Economic model of ethanol production from sugarcane bagasse using three-stage pretreatment and SSaF.
